# Supplementary material for: A simple one-pot synthesis of graphene nanosheet/SnO2 nanoparticle hybrid nanocomposites and their application for selective and sensitive electrochemical detection of dopamine
Source: Royal Society of Chemistry journal article supplement (doi:10.1039/c3tb00513e), 2013-01-01
Supplement: c3tb00513e.pdf [file c3tb00513e.pdf]

# **A simple one-pot synthesis of graphene nanosheets/SnO<sub>2</sub> nanoparticles hybrid nanocomposites and their application for selective and sensitive electrochemical detection of dopamine**

Ankang Yang, Ying Xue, Yang Zhang, Xiaofang Zhang, Hong Zhao<sup>\*</sup>, Xiangjun Li,  
Yujian He, Zhuobin Yuan

*School of Chemistry and Chemical Engineering, University of Chinese Academy of  
Sciences, 19A YuQuan Road, Beijing 100049, China.*

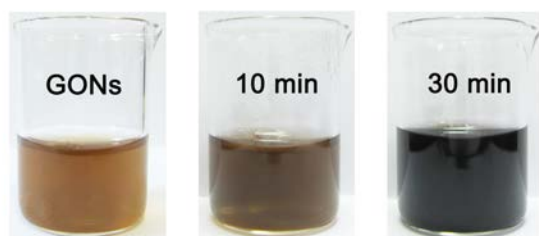

Fig. S1 Photos of the GONs dispersion at different reaction time.

---

<sup>\*</sup> Corresponding author. Tel: +86-10-88256827; Fax: +86-10-88256092.  
*E-mail addresses:* hongzhao@ucas.ac.cn

Table S1 Comparison of different modified electrodes for DA determination.

| Modified electrode               | Linear range ( $\mu\text{M}$ ) | LOD ( $\mu\text{M}$ ) | Fabrication methods   | References |
|----------------------------------|--------------------------------|-----------------------|-----------------------|------------|
| SDS-GNs/SnO <sub>2</sub> /GCE    | 0.1–10                         | 0.08                  | Coating               | This work  |
| $\beta$ -CD-MWCNTs/Plu-AuNPs/GCE | 1.0–50                         | 0.38                  | Coating               | [1]        |
| Nano-MnOOH/GCE                   | 1.2–200                        | 0.1                   | Coating               | [2]        |
| Poly(L-arginine)/CPE             | 50–100                         | 0.5                   | Electropolymerization | [3]        |
| Ag <sub>2</sub> S/GCE            | 1.0–10                         | 1.0                   | Electropolymerization | [4]        |
| Graphene-AuNPs/GCE               | 5.0–1000                       | 1.86                  | Coating               | [5]        |

## References

- [1] D. Jia, J. Dai, H. Yuan, L. Lei and D. Xiao, *Talanta*, 2011, 85, 2344–2351.
- [2] X. Cao, X. Cai and N. Wang, *Sens. Actuators, B*, 2011, 160, 771–776.
- [3] B. N. Chandrashekar, B. E. Kumara Swamy, M. Pandurangachar, T. V. Sathisha and B. S. Sherigara, *Colloids Surf., B*, 2011, 88, 413–418.
- [4] C. Li, Y. Cai, C. Yang, C. Wu, Y. Wei, T. Wen, T. Wang, Y. Shieh, W. Lin and W. Chen, *Electrochim. Acta*, 2011, 56, 1955–1959.
- [5] J. Li, J. Yang, Z. J. Yang, Y. F. Li, S. H. Yu, Q. Xu and X. Y. Hu, *Anal. Methods*, 2012, 4, 1725–1728.
